# Supplementary material for: Evaluation of Metabolic Defects in Fatty Acid Oxidation Using Peripheral Blood Mononuclear Cells Loaded with Deuterium-Labeled Fatty Acids
Source: Hindawi journal article supplement (doi:10.1155/2019/2984747), 2019-02-07
Supplement: f1 [file 2984747.f1.pdf]

## Supplementary Materials

Table S1. Acylcarnitine analysis of fatty acid oxidation test of patients with VLCAD deficiency, CPT-II deficiency and TFP deficiency

| Patients             |     |                                                        | Acylcarnitine analysis of fatty acid oxidation test<br>(nmol/ml lysate) |                                      |                                      |                                      |                                         |
|----------------------|-----|--------------------------------------------------------|-------------------------------------------------------------------------|--------------------------------------|--------------------------------------|--------------------------------------|-----------------------------------------|
| Diagnosis            | No. | Age at the examination of<br>fatty acid oxidation test | d <sub>1</sub> -C2<br>2.98 (0.93)*                                      | d <sub>23</sub> -C12<br>0.15 (0.07)* | d <sub>27</sub> -C14<br>0.22 (0.10)* | d <sub>31</sub> -C16<br>0.78 (0.33)* | d <sub>29</sub> -C16-OH<br>0.01 (0.01)* |
| VLCAD<br>deficiency  | 1   | 0                                                      | 1.16                                                                    | 0.15                                 | 5.75                                 | 4.85                                 | 0.02                                    |
|                      | 2   | 3                                                      | 0.41                                                                    | 0.11                                 | 2.80                                 | 4.15                                 | 0.02                                    |
|                      | 3   | 11                                                     | 0.21                                                                    | 0.02                                 | 0.39                                 | 0.51                                 | 0.01                                    |
|                      | 4   | 19                                                     | 1.25                                                                    | 0.15                                 | 1.20                                 | 1.74                                 | 0.01                                    |
|                      | 5   | 32                                                     | 0.49                                                                    | 0.06                                 | 0.69                                 | 0.89                                 | 0.01                                    |
| CPT-II<br>deficiency | 1   | 0                                                      | 2.79                                                                    | 0.05                                 | 0.22                                 | 20.51                                | 0.02                                    |
|                      | 2   | 1                                                      | 0.38                                                                    | 0.00                                 | 0.03                                 | 2.47                                 | 0.01                                    |
|                      | 3   | 1                                                      | 2.54                                                                    | 0.04                                 | 0.12                                 | 9.73                                 | 0.01                                    |
|                      | 4   | 2                                                      | 1.62                                                                    | 0.03                                 | 0.21                                 | 21.76                                | 0.01                                    |
|                      | 5   | 4                                                      | 0.09                                                                    | 0.00                                 | 0.01                                 | 1.08                                 | 0.00                                    |
|                      | 6   | 9                                                      | 0.18                                                                    | 0.01                                 | 0.04                                 | 0.24                                 | 0.01                                    |
| TFP<br>deficiency    | 1   | 17                                                     | 1.46                                                                    | 0.22                                 | 0.95                                 | 2.27                                 | 0.33                                    |
|                      | 2   | 20                                                     | 2.11                                                                    | 0.34                                 | 1.25                                 | 2.55                                 | 0.62                                    |
|                      | 3   | 25                                                     | 3.27                                                                    | 0.82                                 | 3.39                                 | 7.90                                 | 2.52                                    |

\*Mean (SD) of 23 healthy controls.

Table S2. Acylcarnitine analysis of fatty acid oxidation test of patients with CPT-I deficiency

| Patients with CPT-I deficiency | Age at the examination of fatty acid oxidation test | Acylcarnitine analysis of fatty acid oxidation test             |                                    |                                      |                                                                                                    |                                    |                                     |                                      |
|--------------------------------|-----------------------------------------------------|-----------------------------------------------------------------|------------------------------------|--------------------------------------|----------------------------------------------------------------------------------------------------|------------------------------------|-------------------------------------|--------------------------------------|
|                                |                                                     | loaded with d <sub>31</sub> -hexadecanoic acid (nmol/ml lysate) |                                    |                                      | loaded with d <sub>31</sub> -hexadecanoic acid and d <sub>15</sub> -octanoic acid (nmol/ml lysate) |                                    |                                     |                                      |
| No.                            |                                                     | d <sub>1</sub> -C2<br>2.98 (0.93)*                              | d <sub>7</sub> -C4<br>0.39 (0.20)* | d <sub>31</sub> -C16<br>0.78 (0.33)* | d <sub>1</sub> -C2<br>3.18 (0.95)†                                                                 | d <sub>7</sub> -C4<br>0.48 (0.22)† | d <sub>15</sub> -C8<br>0.05 (0.03)† | d <sub>31</sub> -C16<br>0.49 (0.17)† |
| 1                              | 0                                                   | 0.74                                                            | 0.40                               | 0.24                                 | 0.98                                                                                               | 1.42                               | 0.01                                | 0.14                                 |
| 2                              | 5                                                   | 0.18                                                            | 0.03                               | 0.01                                 | 0.14                                                                                               | 0.15                               | 0.35                                | 0.01                                 |
| 3                              | 5                                                   | 0.99                                                            | 0.03                               | 0.08                                 | 1.11                                                                                               | 0.30                               | 0.01                                | 0.06                                 |

\*Mean (SD) of 23 healthy controls.

†Mean (SD) of 8 other healthy controls.
